# Supplementary material for: Nanoscale carbon dot-embedded metal–organic framework for turn-on fluorescence detection of water in organic solvents
Source: Royal Society of Chemistry journal article supplement (doi:10.1039/d3ra00195d), 2023-01-01
Supplement: d3ra00195d1.pdf [file d3ra00195d1.pdf]

## Supplementary information

# Nanoscale carbon dots-embedded metal-organic framework for turned-on fluorescent detection of water in organic solvents

Theanchai Wiwasuku,<sup>a, d</sup> Jitti Suebphanpho,<sup>a</sup> Somlak Ittisanronnachai,<sup>b</sup>  
Vinich Promarak,<sup>c</sup> Jaurusup Boonmak,<sup>a, \*</sup> and Sujitra Youngme<sup>a</sup>

<sup>a</sup>Materials Chemistry Research Center and Center of Excellence for Innovation in Chemistry, Department of Chemistry, Faculty of Science, Khon Kaen University, Khon Kaen 40002, Thailand.

<sup>b</sup>Frontier Research Center (FRC), Vidyasirimedhi Institute of Science and Technology, Rayong, 21210, Thailand.

<sup>c</sup>Department of Materials Science and Engineering, School of Molecular Science and Engineering, Vidyasirimedhi Institute of Science and Technology, Rayong, 21210, Thailand

<sup>d</sup>Functional Materials and Nanotechnology Center of Excellence, School of Science, Walailak University, Nakhon Si Thammarat, 80160, Thailand.

\*E-mail: [jaurusup@kku.ac.th](mailto:jaurusup@kku.ac.th)

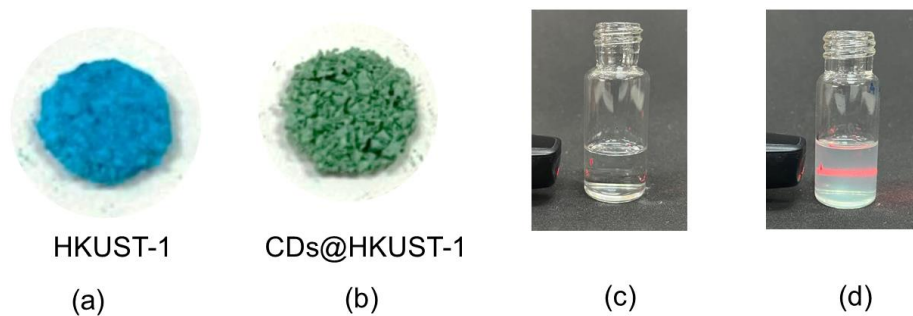

**Figure S1** Photographs of (a) HKUST-1 and (b) CDs@HKUST-1. Tyndall effect of a colloidal ethanol suspension of CDs@HKUST-1 material. Ethanol solution (c) without and (d) with CDs@HKUST-1.

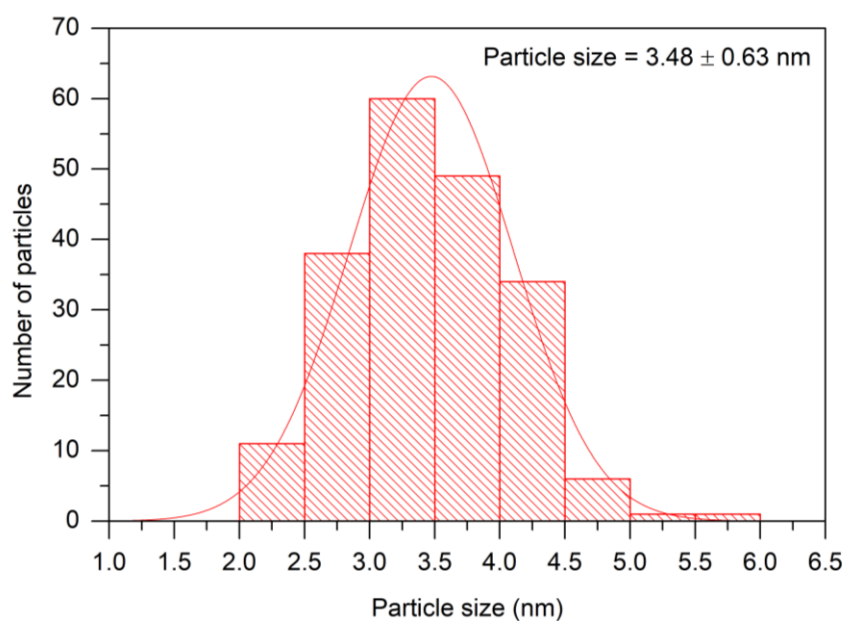

**Figure S2** Size distribution histogram of CDs

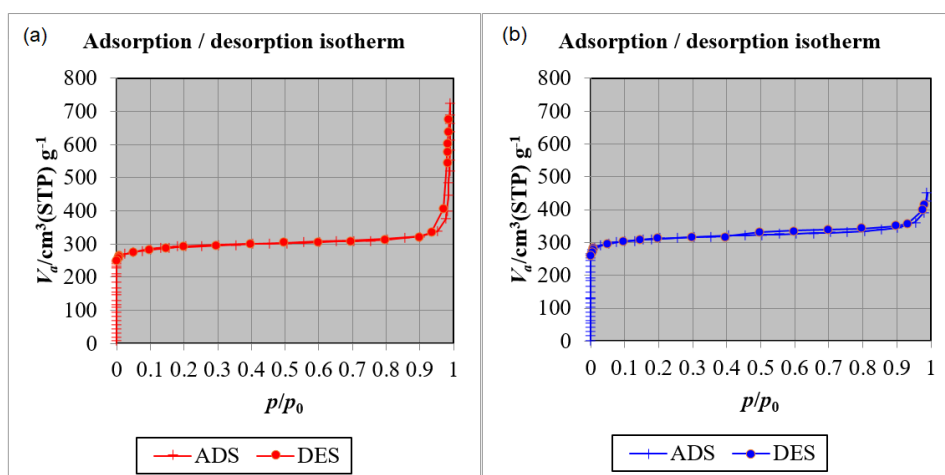

**Figure S3**  $\text{N}_2$  adsorption–desorption isotherms of (a) HKUST-1 and (b) CDs@HKUST-1

**Table S1** BET surface area, total pore volume and average pore diameter of the HKUST-1 and CDs@HKUST-1

|                                                                     | <b>HKUST-1</b> | <b>CDs@HKUST-1</b> |
|---------------------------------------------------------------------|----------------|--------------------|
| BET surface area ( $\text{m}^2\text{g}^{-1}$ )                      | 1144.8         | 1233.2             |
| Total pore volume ( $p/p_0=0.9900$ ) ( $\text{cm}^3\text{g}^{-1}$ ) | 1.0677         | 0.6959             |
| Average pore diameter (nm)                                          | 3.7307         | 2.2571             |

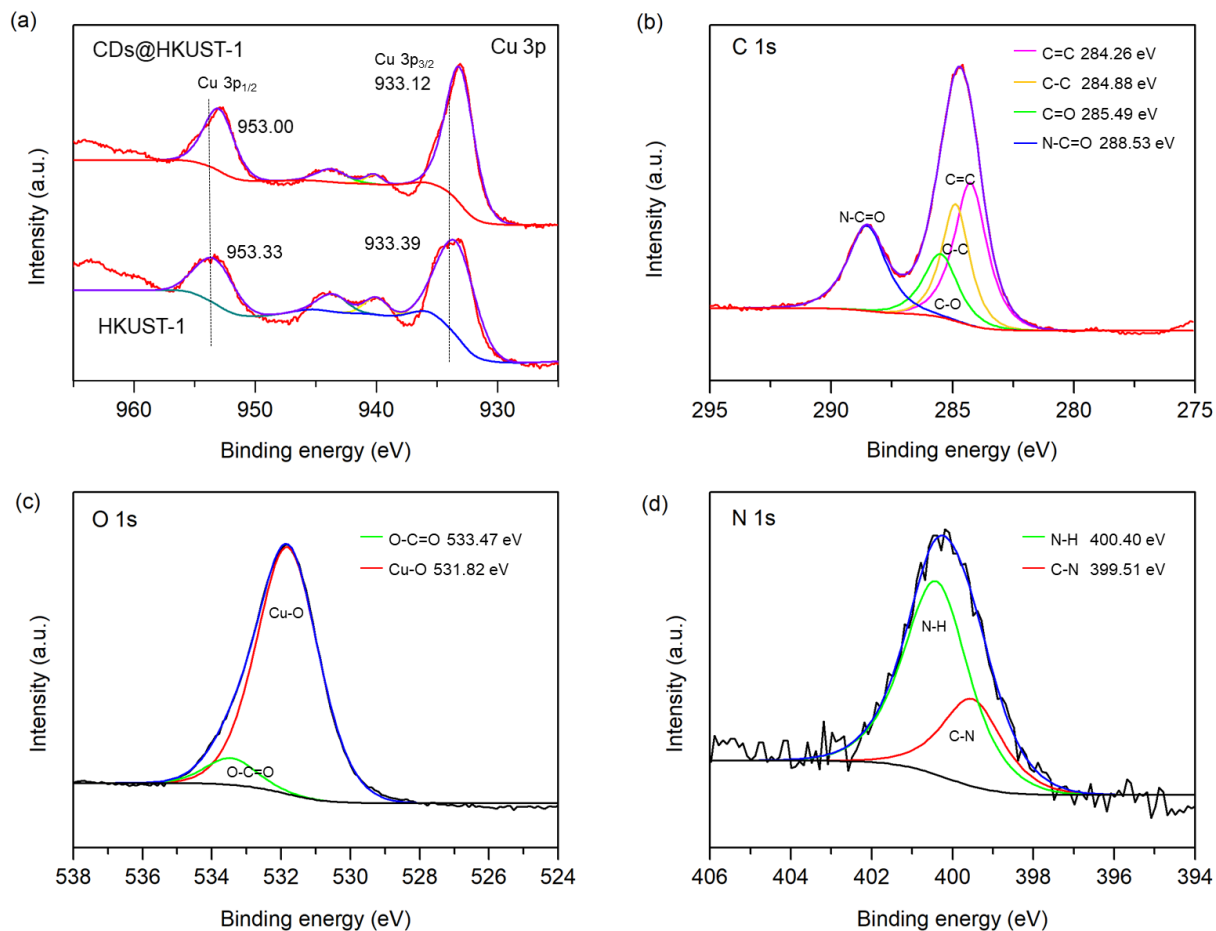

**Figure S4** High-resolution XPS of (a) Cu 3p of HKUST-1 and CDs@HKUST-1, (b-d) C 1s, O 1s, and N 1s spectra of CDs@HKUST-1.

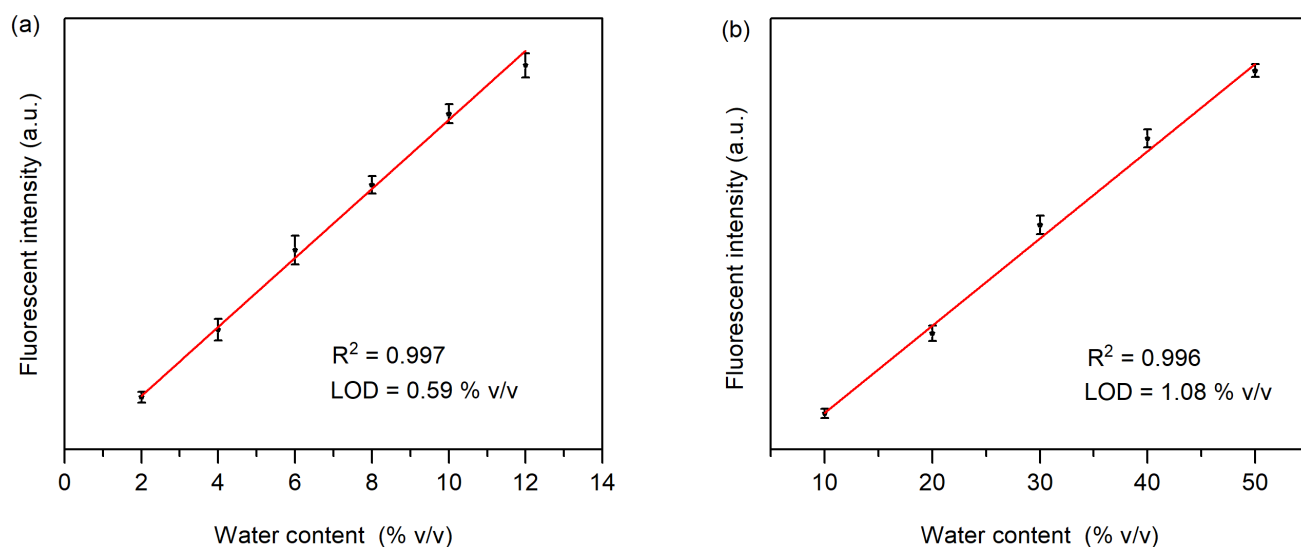

**Figure S5** The linear relationship between fluorescent intensity at 450 nm of CDs@HKUST-1 in (a) ACN and (b) acetone with the incremental addition of water content.

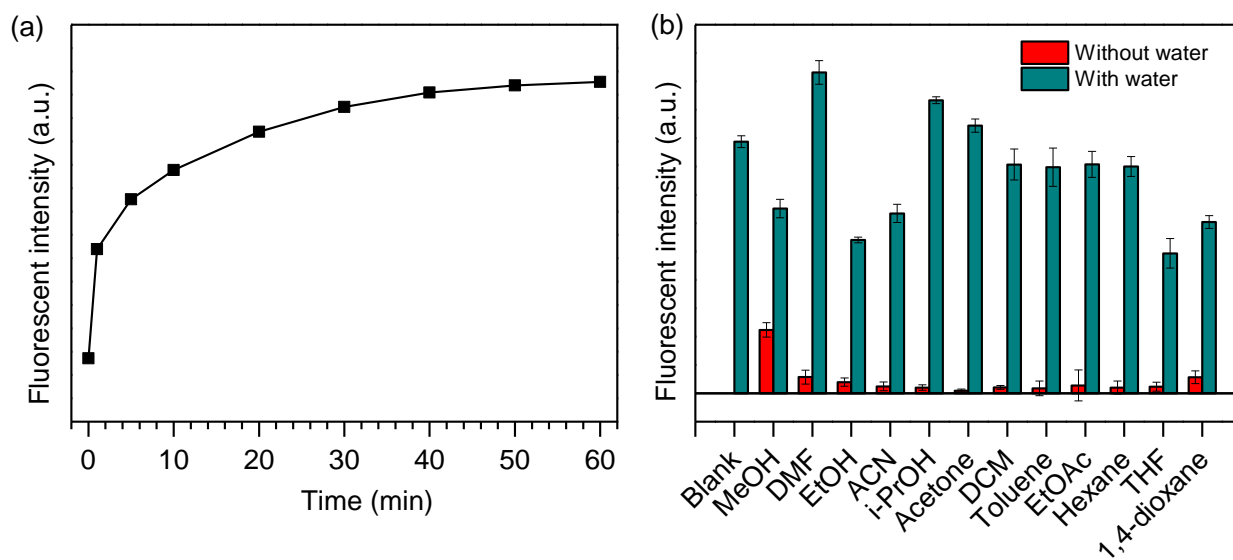

**Figure S6** (a) The response speed of CDs@HKUST-1 toward water (50 %v/v) in EtOH solution. (b) Comparison of fluorescent intensity of CDs@HKUST-1 with organic solvent in the absence and presence of water (50 %v/v).

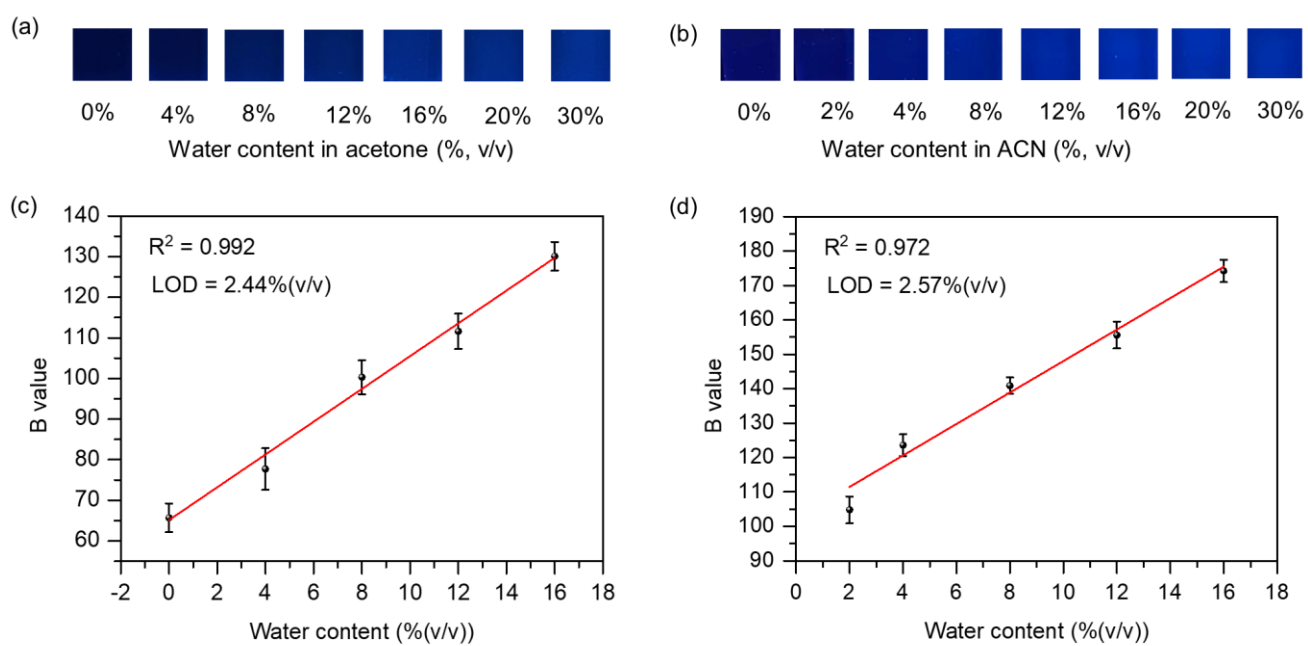

**Figure S7** The digital images of fluorescence change of CDs@HKUST-1 with different water contents in (a) acetone and (b) ACN under UV light (365 nm). Linear relationship between B value and water contents in (c) acetone and (d) ACN.

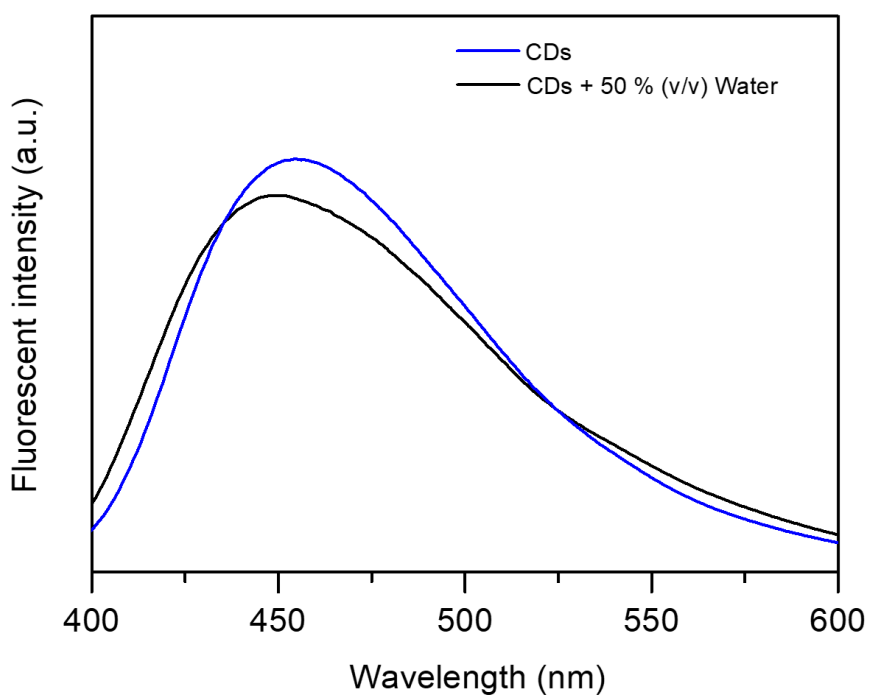

**Figure S8** Fluorescent spectra of untreated CDs (blue line) and treated CDs with water (black line).

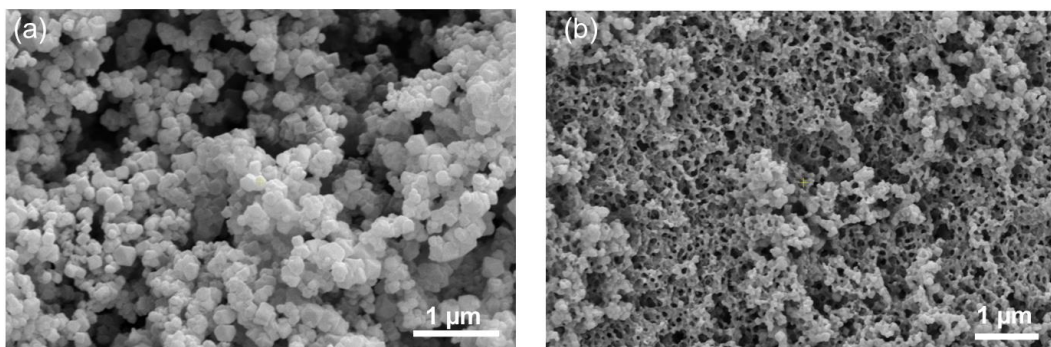

**Figure S9** SEM images of (a) untreated CDs@HKUST-1 and (b) treated CDs@HKUST-1 with water.

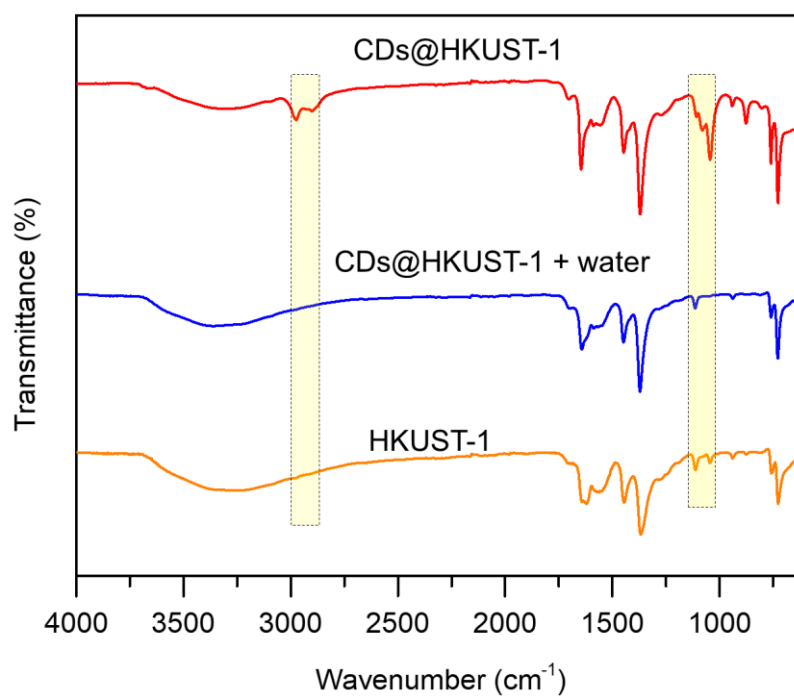

**Figure S10** FT-IR spectrum of HKUST-1 and CDs@HKUST-1 before and after treatment with water.

**Table S2** Calculation of LOD of CDs@HKUST-1 for water in ethanol

| <b>Blank reading</b>               | <b>Fluorescent intensity at 450 nm</b> |
|------------------------------------|----------------------------------------|
| 1                                  | 14630.327                              |
| 2                                  | 14050.346                              |
| 3                                  | 14000.756                              |
| 4                                  | 14590.041                              |
| 5                                  | 14300.003                              |
| 6                                  | 14620.382                              |
| 7                                  | 14408.012                              |
| Standard deviation ( $\sigma$ )    | 246.0342                               |
| Slope from linear equation ( $S$ ) | 1053.335                               |
| LOD = $3\sigma/S$                  | 0.70 %v/v                              |



**Table S3** Comparison of the performance of fluorescent sensor of water based on MOFs

| MOFs                                                                                   | Media        | LOD<br>(%v/v) | Detection<br>range (%v/v) | Detection<br>method              | Ref.             |
|----------------------------------------------------------------------------------------|--------------|---------------|---------------------------|----------------------------------|------------------|
| Tb <sup>3+</sup> @p-CDs/MOF                                                            | DMF          | 0.33          | 0-30                      | Turn-off                         | 1                |
| Tb <sub>97.11</sub> Eu <sub>2.89</sub> -L1                                             | ACN          | 0.04          | 0-2.5                     | Turn-off                         | 2                |
| MOF@Fe <sub>3</sub> O <sub>4</sub> /SiO <sub>2</sub>                                   | Hexane       | 0.03          | 0-10                      | Turn-off                         | 3                |
| Eu <sup>3+</sup> @UiO-66-<br>NH <sub>2</sub> -IM                                       | Ethanol      | 0.05          | 0-2                       | Turn-off                         | 4                |
| Eu <sub>0.02</sub> Dy <sub>0.18</sub> -MOF                                             | Ethanol      | 0.1           | 0-0.3                     | Turn-off                         | 5                |
| AEMOF-1                                                                                | THF          | 0.05          | 0-2                       | Turn-on                          | 6                |
| [Cd(py)L(H <sub>2</sub> O) <sub>2</sub> ]                                              | Iso-propanol | 0.01          | 0-0.36                    | Turn-on                          | 7                |
| [Cd <sub>2</sub> (4,5- <i>idc</i> )(2,5- <i>tpt</i> )(H <sub>2</sub> O) <sub>4</sub> ] | DMF          | 0.25          | 0-50                      | Shifted emission<br>and turn-off | 8                |
| N,S-CDs@Eu-MOF                                                                         | Ethanol      | -             | 0.19-0.82                 | Ratiometric<br>sensing           | 9                |
|                                                                                        | ACN          | -             | 0.3-2.2                   |                                  |                  |
|                                                                                        | DMF          | -             | 0.5-2.5                   |                                  |                  |
| Zn-MOF74                                                                               | Acetone      | 0.045         | 0-1.5                     | Turn-on                          | 10               |
| CDs@HKUST-1                                                                            | Ethanol      | 0.70          | 0-70                      | Turn-on                          | <b>This work</b> |
|                                                                                        | ACN          | 0.59          | 2-12                      |                                  |                  |
|                                                                                        | Acetone      | 1.08          | 10-50                     |                                  |                  |

## Reference

- [1] Wang, K.-M.; Du, L.; Ma, Y.-L.; Zhao, J.-S.; Wang, Q.; Yan, T.; Zhao, Q.-H. Multifunctional Chemical Sensors and Luminescent Thermometers Based on Lanthanide Metal-Organic Framework Materials. *CrystEngComm*. 2016, 18, 2690-2700.
- [2] Zhao, D.; Yue, D.; Jiang, K.; Zhang, L.; Li, C.; Qian, G. Isostructural Tb<sup>3+</sup>/Eu<sup>3+</sup> Co-Doped Metal-Organic Framework Based on Pyridine-Containing Dicarboxylate Ligands for Ratiometric Luminescence Temperature Sensing. *Inorg. Chem*. 2019, 58, 2637-2644.
- [3] An, R.; Zhao, H.; Hu, H.-M.; Wang, X.; Yang, M.-L.; Xue, G. Synthesis, Structure, WhiteLight Emission, and Temperature Recognition Properties of Eu/Tb Mixed Coordination Polymers. *Inorg. Chem*. 2016, 55, 871-876.

- [4] Li, H.; Han, W.; Lv, R.; Zhai, A.; Li, X.-L.; Gu, W.; Liu, X. Dual-Function Mixed-Lanthanide Metal-Organic Framework for Ratiometric Water Detection in Bioethanol and Temperature Sensing. *Anal. Chem.* 2019, 91, 2148-2154.
- [5] Wu, L.-L.; Zhao, J.; Wang, H.; Wang, J. A Lanthanide(III) Metal-Organic Framework Exhibiting Ratiometric Luminescent Temperature Sensing and Tunable White Light Emission. *CrystEngComm.* 2016, 18, 4268-4271.
- [6] Zhao, D.; Rao, X.; Yu, J.; Cui, Y.; Yang, Y.; Qian, G. Design and Synthesis of an MOF Thermometer with High Sensitivity in the Physiological Temperature Range. *Inorg. Chem.* 2015, 54, 11193-11199.
- [7] Rao, X.; Song, T.; Gao, J.; Cui, Y.; Yang, Y.; Wu, C.; Chen, B.; Qian, G. A Highly Sensitive Mixed Lanthanide Metal-Organic Framework Self-Calibrated Luminescent Thermometer. *J. Am. Chem. Soc.* 2013, 135, 15559-15564.
- [8] Othong, J.; Boonmak, J.; Kielar, F.; Youngme S. Dual Function Based on Switchable Colorimetric Luminescence for Water and Temperature Sensing in Two-Dimensional Metal–Organic Framework Nanosheets. *ACS Appl. Mater. Interfaces* **2020**, 12 (37), 41776-41784.
- [9] Gao, J.P.; Yao, R.X.; Chen, X.H.; Li, H.H.; Zhang, X.M. Blue luminescent N,S-doped carbon dots encapsulated in red emissive Eu-MOF to form dually emissive composite for reversible anti-counterfeit ink. *Dalton Trans.* **2020**, 50, 1690–1696.
- [10] Zhang, Z.; Zhong, T.; Wang, G. Zn-MOF74 as a “turn-on” fluorescent chemosensor for recognition and detection of water in acetone and Al<sup>3+</sup> in ethanol with high selectivity and sensitivity. *J. Photochem. Photobiol. A.* **2022**, 431, 114052.
